# Supplementary material for: Using genomic relationship likelihood for parentage assignment
Source: PubMed Central journal article supplement (PMC5960170; doi:10.1186/s12711-018-0397-7), 2018-05-18

Figure S1

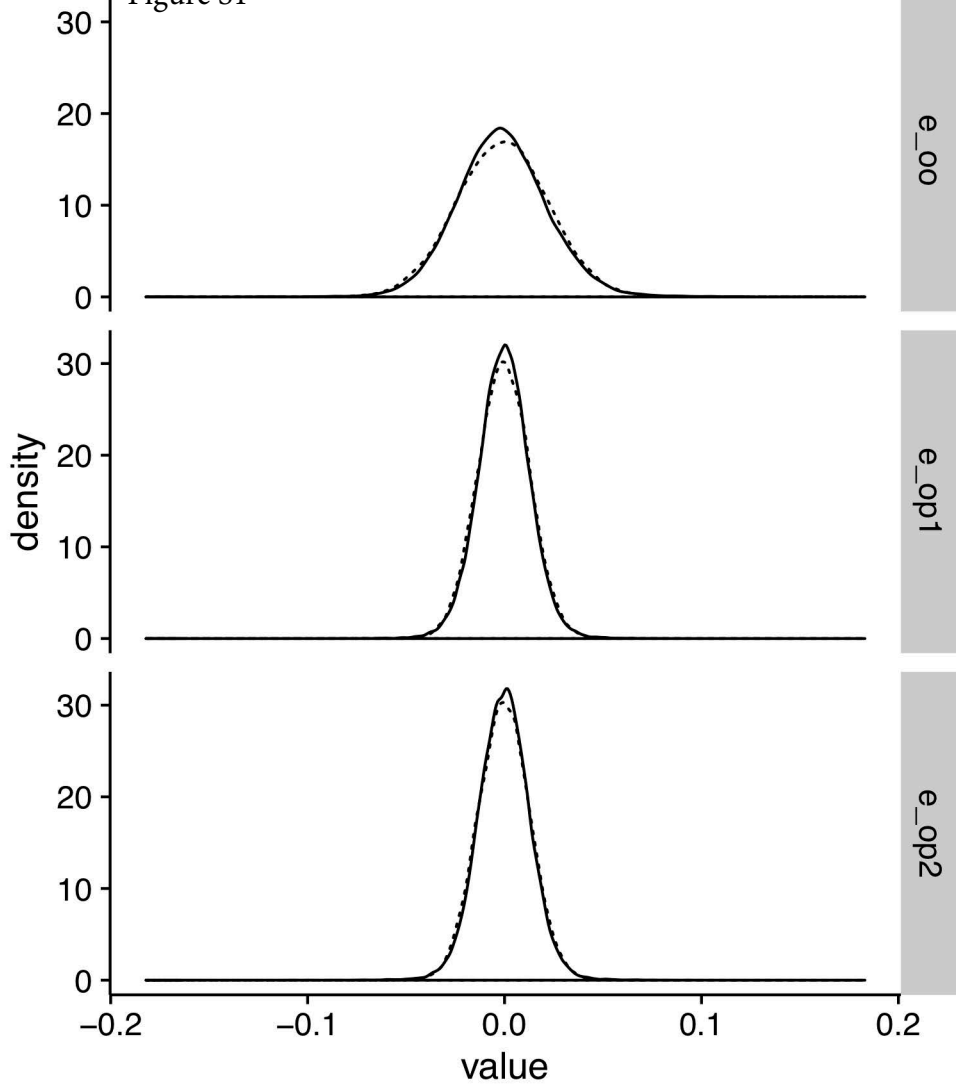

Figure S2

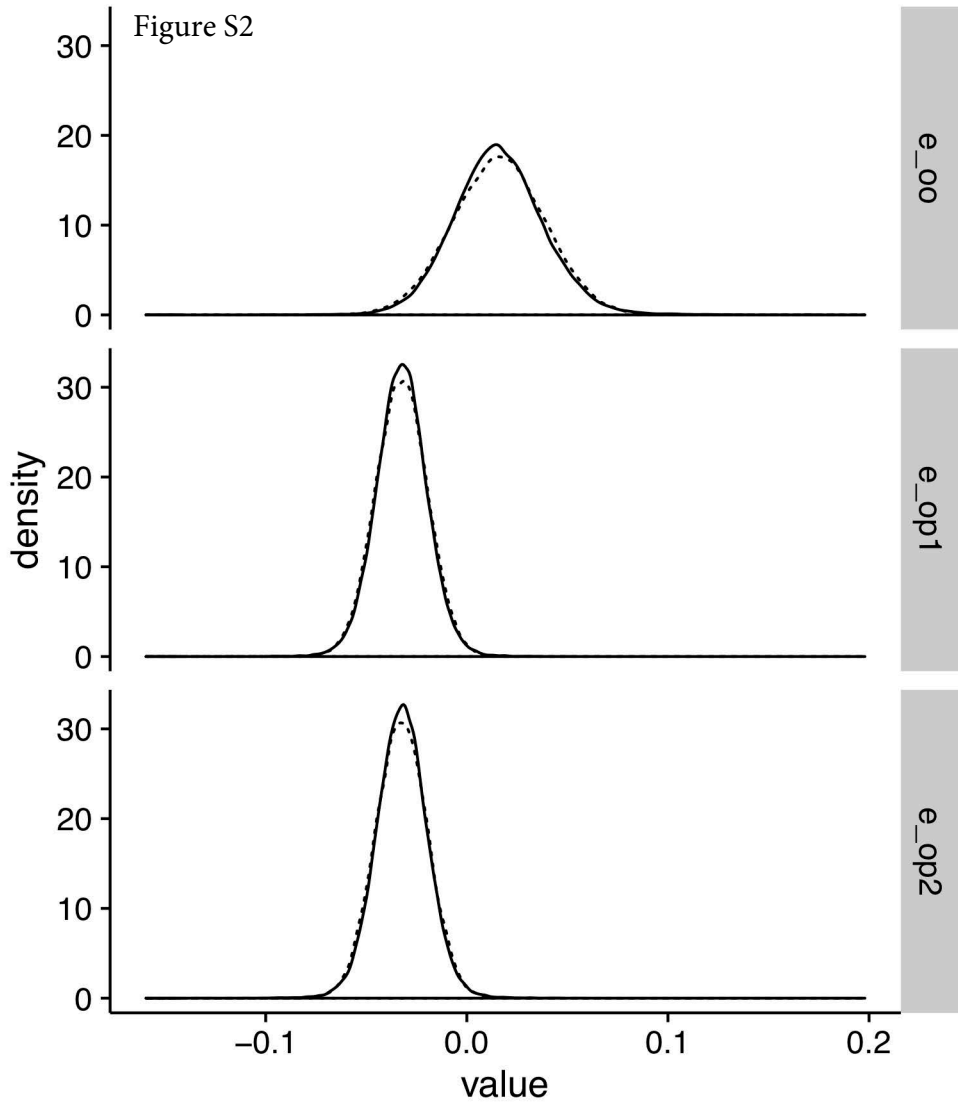

Figure S3

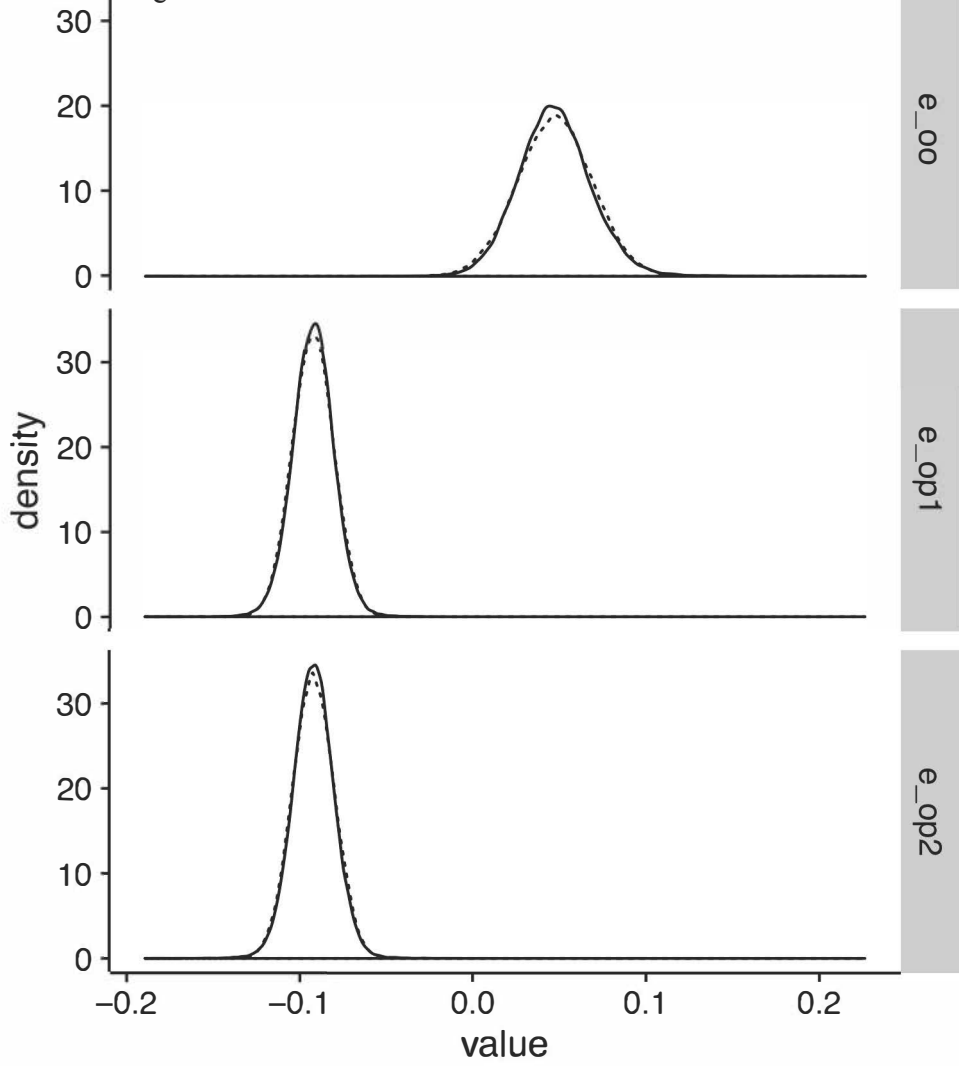

Supplement: 12711_2018_397_MOESM1_ESM.pdf [file 12711_2018_397_MOESM1_ESM.pdf]
