# Supplementary material for: Using genomic relationship likelihood for parentage assignment
Source: PubMed Central journal article supplement (PMC5960170; doi:10.1186/s12711-018-0397-7), 2018-05-18

Figure S4

**1000 parents, 3% err**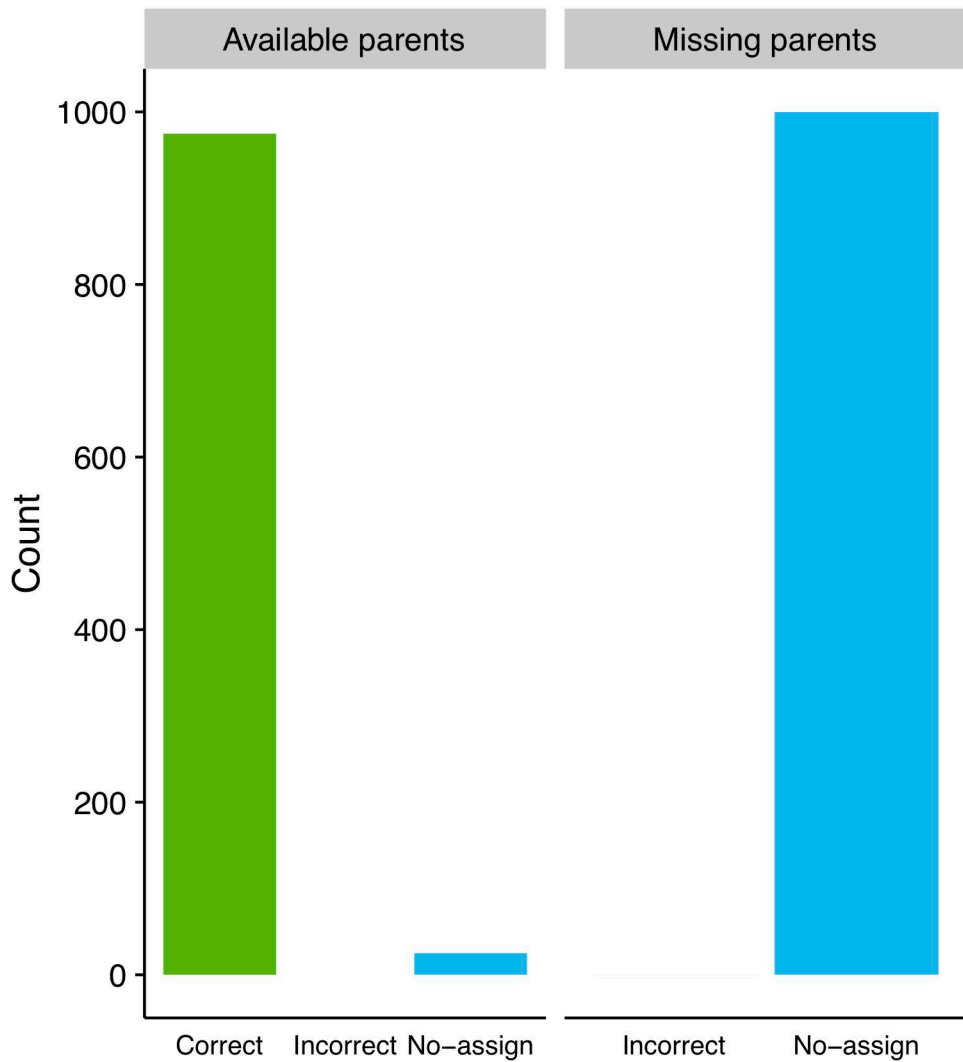

Figure S5

# 1000 parents, 3% err

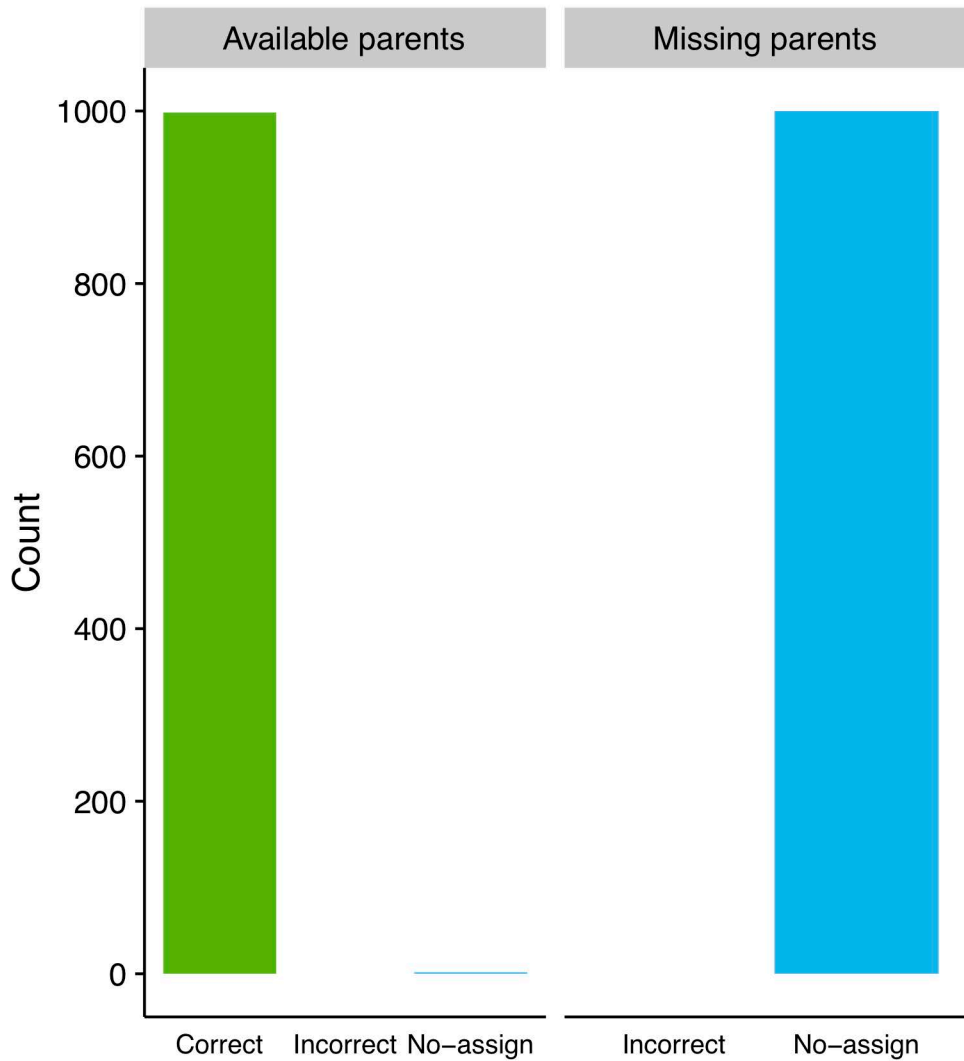

Figure S6

# 1000 parents, 3% err

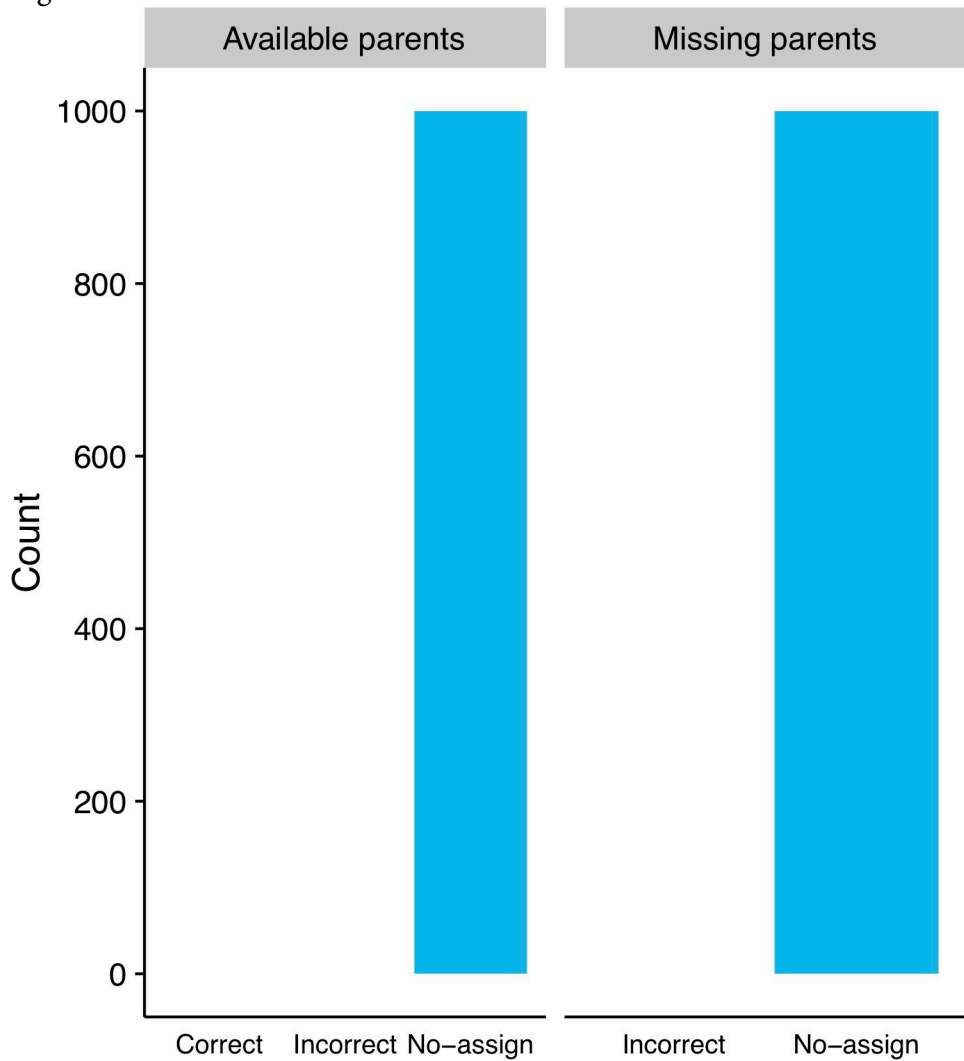

Figure S7

# 1000 parents, 3% err

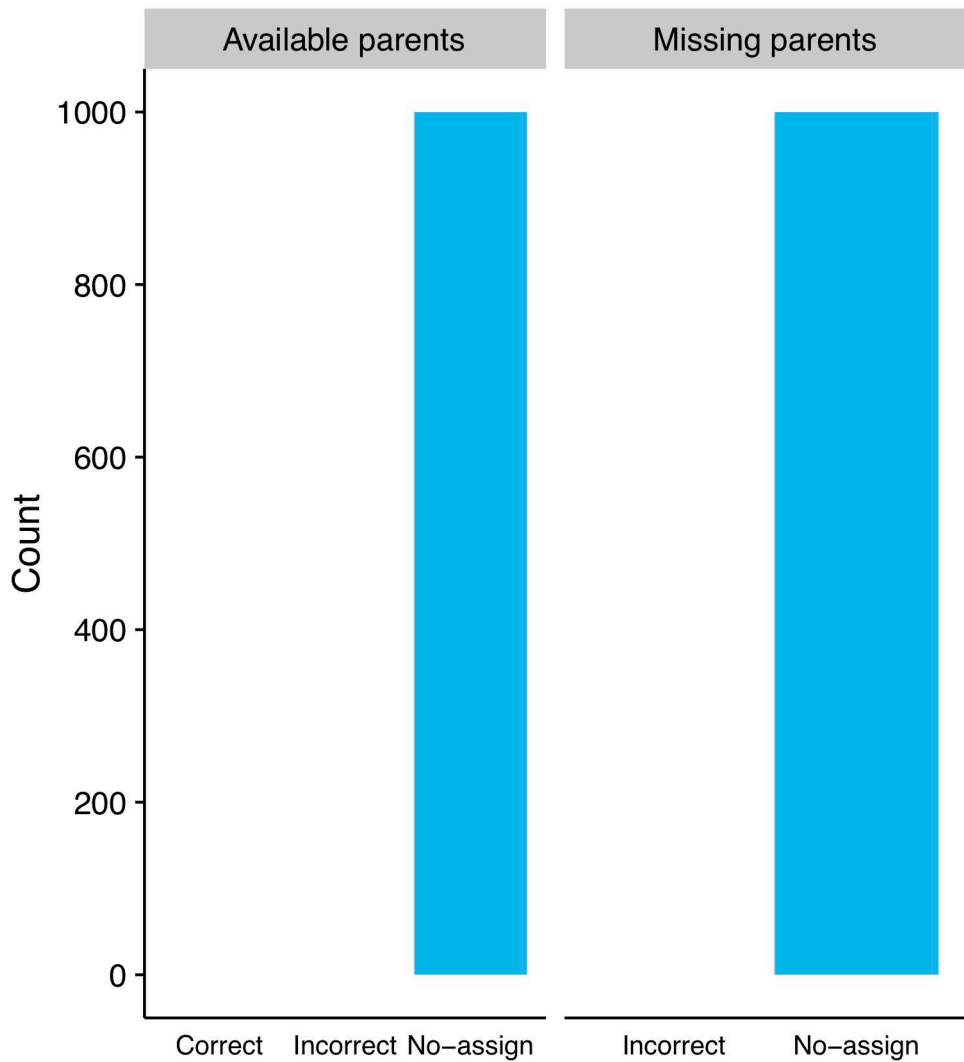

Figure S8

### 1000 parents, 1% err

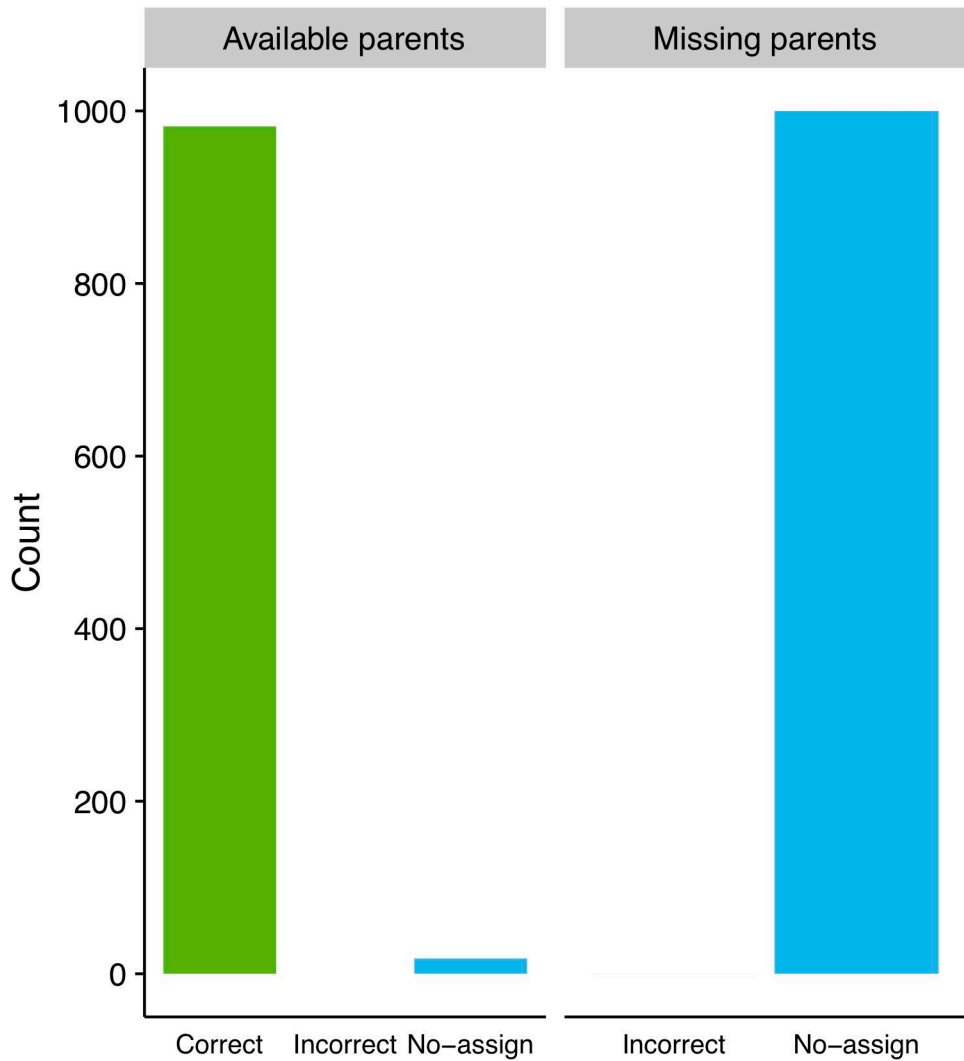

Figure S9

**1000 parents, 1% err**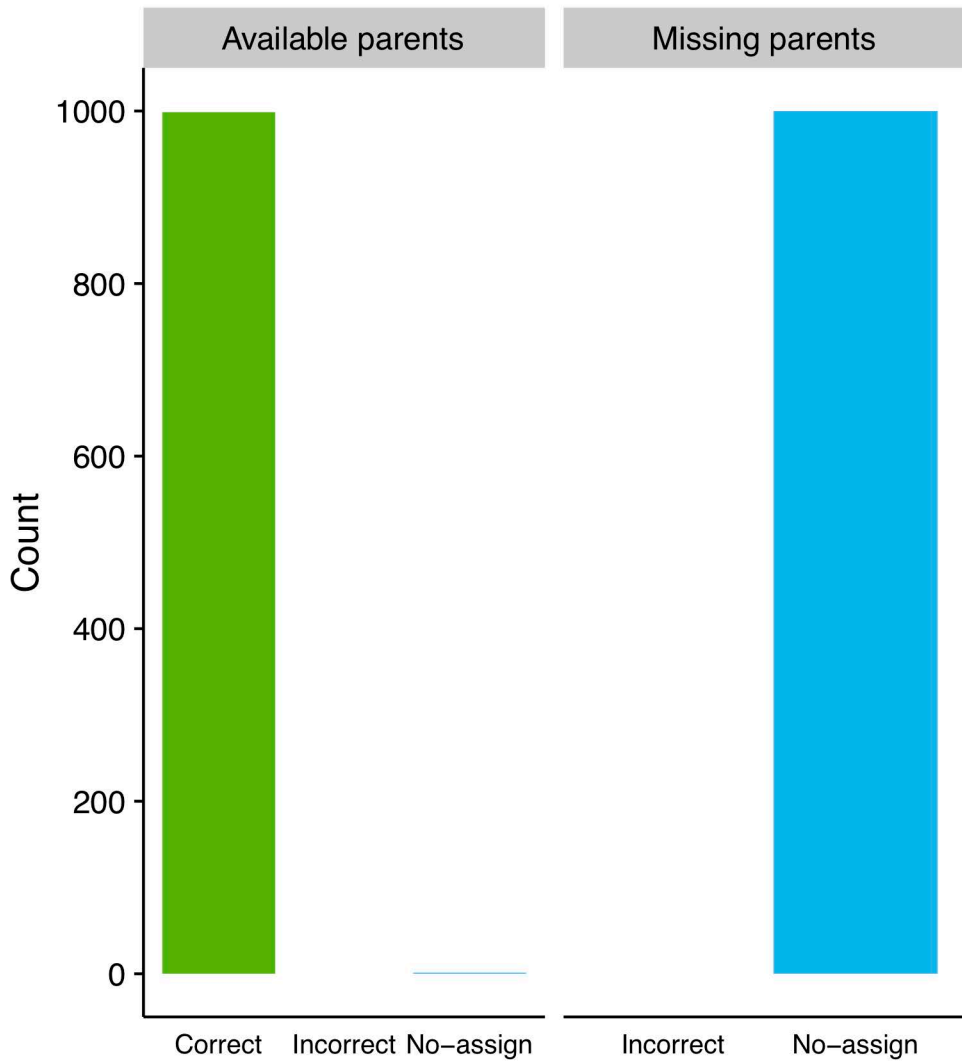

Figure S10

**1000 parents, 3% err**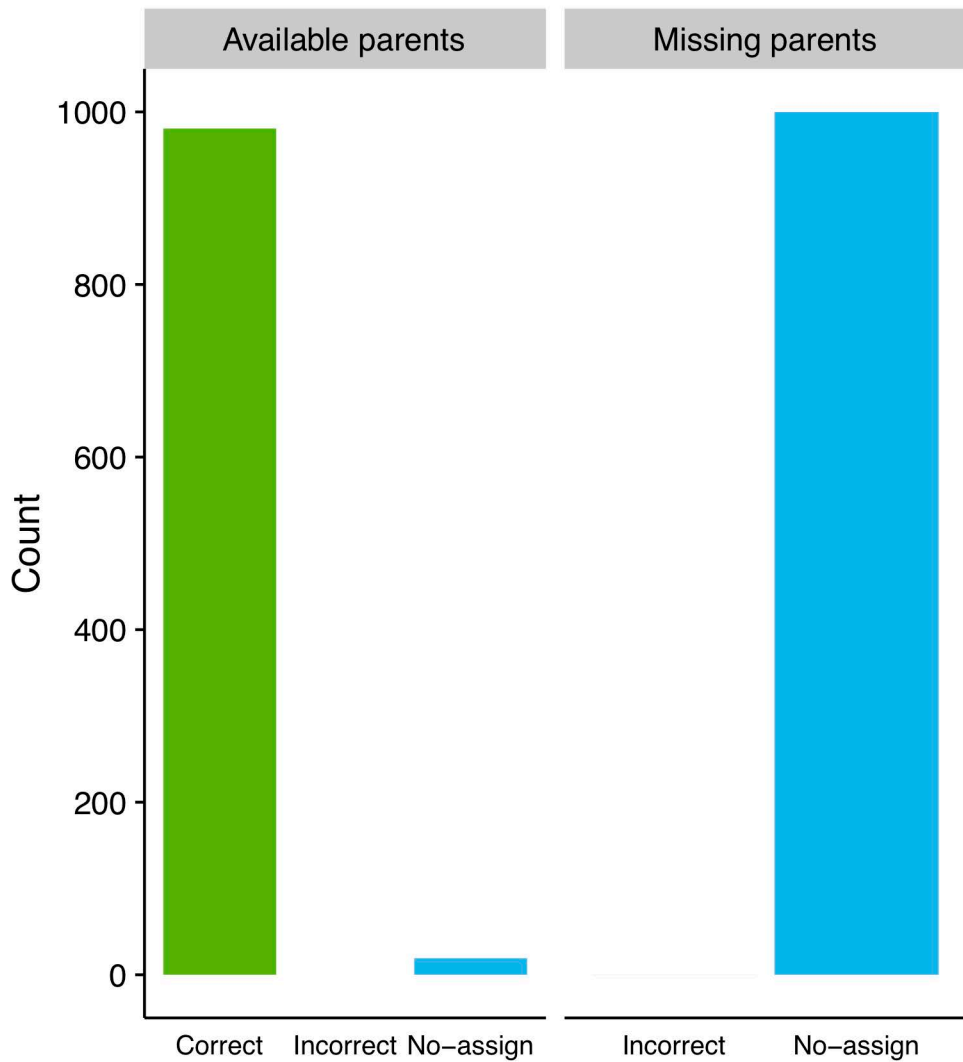

Figure S11

# 1000 parents, 3% err

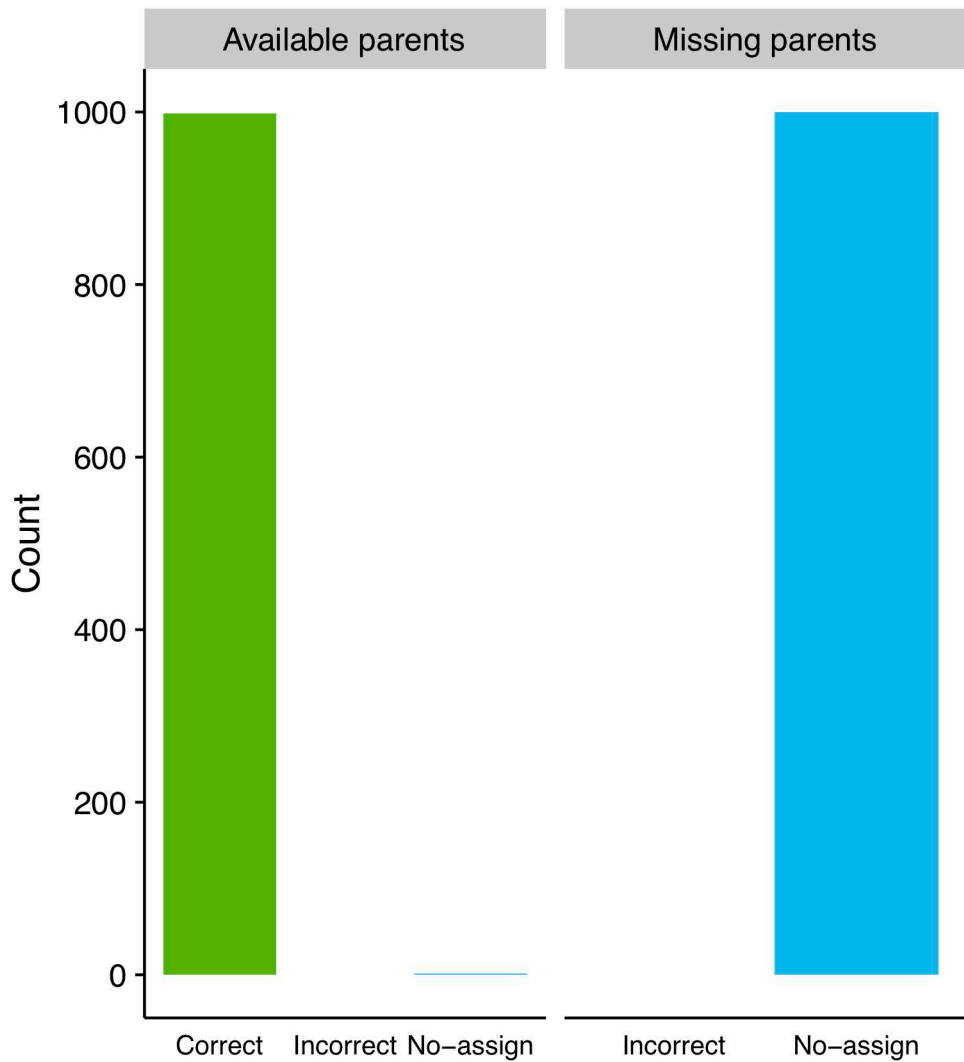

Supplement: 12711_2018_397_MOESM3_ESM.pdf [file 12711_2018_397_MOESM3_ESM.pdf]
